# Supplementary material for: First Molecular Characterization of Small Ruminant Lentiviruses Detected in Romania
Source: MDPI journal article supplement (doi:10.3390/ani13233718), 2023-11-30
Supplement: s1 [file s1]

Table S2. Estimated of mean genetic nucleotide distances (model p-distance) between subtypes of genotype A and Romanian strains based on the CA fragment of *gag* gene.

|                  | A1    | A2    | A2/A3 | A3    | A4    | A5    | A8    | A9    | A11   | A12   | A13   | A16   | A17   | A18   | A19   | A20   | A21   | A22   | A23   | A24   | A25   | A26   | A27   | Romanian strains |
|------------------|-------|-------|-------|-------|-------|-------|-------|-------|-------|-------|-------|-------|-------|-------|-------|-------|-------|-------|-------|-------|-------|-------|-------|------------------|
| A1               |       | 0,014 | 0,012 | 0,015 | 0,015 | 0,014 | 0,015 | 0,016 | 0,015 | 0,014 | 0,015 | 0,014 | 0,015 | 0,016 | 0,014 | 0,015 | 0,014 | 0,017 | 0,016 | 0,016 | 0,015 | 0,016 | 0,014 | 0,013            |
| A2               | 0,165 |       | 0,011 | 0,014 | 0,015 | 0,013 | 0,014 | 0,015 | 0,014 | 0,012 | 0,012 | 0,013 | 0,013 | 0,013 | 0,014 | 0,014 | 0,012 | 0,015 | 0,014 | 0,013 | 0,012 | 0,013 | 0,013 | 0,011            |
| A2/A3            | 0,164 | 0,146 |       | 0,012 | 0,012 | 0,011 | 0,012 | 0,012 | 0,012 | 0,010 | 0,011 | 0,012 | 0,012 | 0,013 | 0,011 | 0,013 | 0,011 | 0,014 | 0,013 | 0,012 | 0,011 | 0,012 | 0,012 | 0,010            |
| A3               | 0,160 | 0,137 | 0,143 |       | 0,015 | 0,013 | 0,014 | 0,014 | 0,013 | 0,012 | 0,014 | 0,015 | 0,012 | 0,016 | 0,013 | 0,015 | 0,013 | 0,016 | 0,014 | 0,013 | 0,014 | 0,015 | 0,014 | 0,010            |
| A4               | 0,165 | 0,161 | 0,156 | 0,161 |       | 0,014 | 0,014 | 0,016 | 0,015 | 0,014 | 0,015 | 0,013 | 0,014 | 0,017 | 0,014 | 0,015 | 0,015 | 0,016 | 0,015 | 0,014 | 0,014 | 0,015 | 0,015 | 0,013            |
| A5               | 0,169 | 0,153 | 0,148 | 0,141 | 0,155 |       | 0,013 | 0,014 | 0,014 | 0,012 | 0,014 | 0,014 | 0,013 | 0,015 | 0,013 | 0,013 | 0,013 | 0,015 | 0,014 | 0,013 | 0,014 | 0,014 | 0,013 | 0,010            |
| A8               | 0,172 | 0,174 | 0,168 | 0,164 | 0,171 | 0,172 |       | 0,013 | 0,013 | 0,013 | 0,014 | 0,014 | 0,014 | 0,015 | 0,012 | 0,014 | 0,014 | 0,016 | 0,013 | 0,011 | 0,013 | 0,014 | 0,014 | 0,012            |
| A9               | 0,164 | 0,157 | 0,145 | 0,137 | 0,157 | 0,152 | 0,149 |       | 0,013 | 0,014 | 0,015 | 0,016 | 0,014 | 0,017 | 0,013 | 0,015 | 0,015 | 0,017 | 0,014 | 0,013 | 0,015 | 0,016 | 0,015 | 0,013            |
| A11              | 0,174 | 0,158 | 0,158 | 0,152 | 0,178 | 0,171 | 0,166 | 0,148 |       | 0,012 | 0,013 | 0,014 | 0,014 | 0,015 | 0,011 | 0,013 | 0,013 | 0,016 | 0,012 | 0,013 | 0,014 | 0,014 | 0,013 | 0,013            |
| A12              | 0,167 | 0,130 | 0,145 | 0,130 | 0,164 | 0,151 | 0,165 | 0,165 | 0,147 |       | 0,012 | 0,013 | 0,012 | 0,014 | 0,013 | 0,012 | 0,012 | 0,015 | 0,013 | 0,012 | 0,012 | 0,013 | 0,013 | 0,010            |
| A13              | 0,163 | 0,113 | 0,145 | 0,132 | 0,151 | 0,147 | 0,164 | 0,160 | 0,143 | 0,133 |       | 0,014 | 0,015 | 0,014 | 0,014 | 0,014 | 0,012 | 0,017 | 0,015 | 0,013 | 0,013 | 0,014 | 0,012 | 0,011            |
| A16              | 0,184 | 0,159 | 0,157 | 0,175 | 0,155 | 0,167 | 0,191 | 0,194 | 0,181 | 0,166 | 0,160 |       | 0,014 | 0,014 | 0,014 | 0,014 | 0,013 | 0,015 | 0,015 | 0,014 | 0,013 | 0,014 | 0,013 | 0,012            |
| A17              | 0,155 | 0,128 | 0,147 | 0,105 | 0,142 | 0,133 | 0,162 | 0,126 | 0,160 | 0,123 | 0,137 | 0,157 |       | 0,015 | 0,013 | 0,014 | 0,014 | 0,015 | 0,015 | 0,013 | 0,014 | 0,014 | 0,013 | 0,009            |
| A18              | 0,188 | 0,128 | 0,147 | 0,154 | 0,171 | 0,170 | 0,187 | 0,173 | 0,175 | 0,154 | 0,128 | 0,166 | 0,141 |       | 0,015 | 0,015 | 0,014 | 0,015 | 0,016 | 0,015 | 0,014 | 0,014 | 0,014 | 0,013            |
| A19              | 0,182 | 0,173 | 0,157 | 0,147 | 0,165 | 0,165 | 0,162 | 0,133 | 0,148 | 0,168 | 0,172 | 0,191 | 0,157 | 0,183 |       | 0,013 | 0,014 | 0,015 | 0,012 | 0,012 | 0,013 | 0,014 | 0,014 | 0,012            |
| A20              | 0,181 | 0,157 | 0,174 | 0,170 | 0,181 | 0,159 | 0,177 | 0,179 | 0,158 | 0,155 | 0,158 | 0,170 | 0,169 | 0,175 | 0,196 |       | 0,013 | 0,015 | 0,014 | 0,014 | 0,013 | 0,013 | 0,013 | 0,012            |
| A21              | 0,159 | 0,153 | 0,144 | 0,144 | 0,188 | 0,157 | 0,182 | 0,166 | 0,155 | 0,143 | 0,139 | 0,169 | 0,160 | 0,155 | 0,185 | 0,159 |       | 0,015 | 0,015 | 0,013 | 0,013 | 0,013 | 0,012 | 0,011            |
| A22              | 0,233 | 0,206 | 0,205 | 0,193 | 0,214 | 0,191 | 0,219 | 0,209 | 0,217 | 0,205 | 0,210 | 0,226 | 0,194 | 0,196 | 0,205 | 0,216 | 0,203 |       | 0,015 | 0,015 | 0,016 | 0,016 | 0,015 | 0,014            |
| A23              | 0,203 | 0,177 | 0,186 | 0,169 | 0,186 | 0,181 | 0,176 | 0,158 | 0,151 | 0,169 | 0,185 | 0,205 | 0,175 | 0,201 | 0,156 | 0,168 | 0,198 | 0,209 |       | 0,013 | 0,015 | 0,015 | 0,015 | 0,013            |
| A24              | 0,163 | 0,138 | 0,148 | 0,136 | 0,159 | 0,150 | 0,138 | 0,133 | 0,148 | 0,141 | 0,140 | 0,177 | 0,137 | 0,166 | 0,140 | 0,174 | 0,148 | 0,202 | 0,154 |       | 0,013 | 0,013 | 0,013 | 0,011            |
| A25              | 0,162 | 0,122 | 0,148 | 0,142 | 0,153 | 0,151 | 0,162 | 0,142 | 0,164 | 0,140 | 0,122 | 0,157 | 0,138 | 0,125 | 0,163 | 0,148 | 0,158 | 0,205 | 0,180 | 0,151 |       | 0,013 | 0,013 | 0,012            |
| A26              | 0,164 | 0,117 | 0,141 | 0,142 | 0,161 | 0,137 | 0,153 | 0,157 | 0,142 | 0,134 | 0,113 | 0,162 | 0,137 | 0,111 | 0,166 | 0,142 | 0,136 | 0,179 | 0,180 | 0,126 | 0,111 |       | 0,013 | 0,011            |
| A27              | 0,150 | 0,129 | 0,145 | 0,136 | 0,159 | 0,141 | 0,169 | 0,156 | 0,149 | 0,139 | 0,114 | 0,151 | 0,142 | 0,132 | 0,173 | 0,153 | 0,135 | 0,200 | 0,183 | 0,149 | 0,129 | 0,114 |       | 0,011            |
| Romanian strains | 0,156 | 0,126 | 0,137 | 0,103 | 0,144 | 0,125 | 0,166 | 0,138 | 0,157 | 0,126 | 0,124 | 0,160 | 0,100 | 0,136 | 0,160 | 0,162 | 0,142 | 0,196 | 0,178 | 0,131 | 0,138 | 0,121 | 0,123 |                  |
