# Supplementary material for: First Molecular Characterization of Small Ruminant Lentiviruses Detected in Romania
Source: MDPI journal article supplement (doi:10.3390/ani13233718), 2023-11-30
Supplement: s1 [file s1]

Table S1. Estimated of mean genetic nucleotide distances (model p-distance) between subtypes of genotype A and Romanian strains based on the *gag-pol* fragment.

|                  | A1          | A2          | A2/A3       | A3          | A4          | A5          | A8          | A9          | A11         | A19         | A20         | A21         | A22         | A23         | A24         |
|------------------|-------------|-------------|-------------|-------------|-------------|-------------|-------------|-------------|-------------|-------------|-------------|-------------|-------------|-------------|-------------|
| A1               | -           | -           | -           | -           | -           | -           | -           | -           | -           | -           | -           | -           | -           | -           | -           |
| A2               | 17.0        | -           | -           | -           | -           | -           | -           | -           | -           | -           | -           | -           | -           | -           | -           |
| A2/A3            | 17.5        | 16.2        | -           | -           | -           | -           | -           | -           | -           | -           | -           | -           | -           | -           | -           |
| A3               | 17.1        | 12.6        | 16.1        | -           | -           | -           | -           | -           | -           | -           | -           | -           | -           | -           | -           |
| A4               | 18.0        | 17.8        | 17.3        | 17.3        | -           | -           | -           | -           | -           | -           | -           | -           | -           | -           | -           |
| A5               | 16.4        | 15.9        | 16.6        | 14.5        | 15.6        | -           | -           | -           | -           | -           | -           | -           | -           | -           | -           |
| A8               | 18.8        | 18.0        | 17.9        | 17.3        | 18.8        | 18.9        | -           | -           | -           | -           | -           | -           | -           | -           | -           |
| A9               | 19.8        | 18.0        | 18.1        | 17.0        | 17.5        | 18.1        | 17.9        | -           | -           | -           | -           | -           | -           | -           | -           |
| A11              | 19.2        | 17.2        | 18.0        | 16.7        | 20.0        | 17.3        | 17.5        | 16.9        | -           | -           | -           | -           | -           | -           | -           |
| A19              | 20.1        | 18.3        | 18.1        | 17.4        | 18.8        | 17.3        | 18.4        | 17.0        | 17.0        | -           | -           | -           | -           | -           | -           |
| A20              | 18.7        | 18.5        | 18.8        | 17.4        | 19.6        | 17.3        | 19.7        | 19.6        | 18.9        | 21.8        | -           | -           | -           | -           | -           |
| A21              | 18.1        | 15.4        | 16.4        | 15.1        | 18.5        | 16.2        | 18.1        | 18.0        | 17.1        | 19.1        | 18.5        | -           | -           | -           | -           |
| A22              | 22.3        | 20.2        | 21.2        | 20.0        | 21.1        | 19.1        | 21.7        | 21.1        | 21.0        | 21.4        | 23.0        | 20.5        | -           | -           | -           |
| A23              | 19.5        | 18.0        | 18.6        | 17.6        | 19.4        | 18.6        | 18.6        | 18.4        | 17.6        | 17.8        | 18.6        | 19.0        | 21.1        | -           | -           |
| A24              | 17.7        | 15.7        | 17.1        | 15.4        | 18.0        | 15.9        | 16.1        | 16.1        | 16.0        | 16.5        | 19.4        | 16.7        | 20.8        | 17.5        | -           |
| Romanian strains | <b>16.8</b> | <b>12.0</b> | <b>15.6</b> | <b>11.5</b> | <b>16.7</b> | <b>14.2</b> | <b>17.1</b> | <b>17.5</b> | <b>17.0</b> | <b>17.2</b> | <b>18.5</b> | <b>15.2</b> | <b>19.5</b> | <b>17.7</b> | <b>15.0</b> |
